# Supplementary material
Source: publisher site journal article supplement (https://www.dovepress.com/article/377631)
Supplement: Supplementary file 1 [file get_supplementary_file.php]

SUPPLEMENTARY TABLE

Lugogo et al

**A new approach to predict asthma exacerbations: a 12-week, open-label study using an electronic multi-dose dry powder inhaler with integrated sensors**

**Supplementary Table S1:** Baseline demographics and maintenance medication use

|  | **ITT population,**  **N=397** |
| --- | --- |
| **Mean age, years (range)** | 50.1 (18–87) |
| **Females, n (%)** | 318 (80.1) |
| **Mean body mass index, kg/m2 (SD)** | 33.2 (8.4) |
| **Race, n (%)** |  |
| **White** | 313 (78.8) |
| **Black or African American** | 74 (18.6) |
| **Mean number of exacerbations in the previous 12 months (SD)** | 1.5 (1.3) |
| **Maintenance medication, n (%)** |  |
| **ICS** | 18 (4.5) |
| **ICS/LABA** | 343 (86.4) |
| **ICS/LAMA** | 3 (0.8) |
| **ICS/LABA/LAMA** | 31 (7.8) |
| **Not available** | 2 (0.5) |

**Abbreviations:** ICS, inhaled corticosteroids; ITT, intention-to-treat; LABA, long-acting beta2-agonist; LAMA, long-acting muscarinic agent; SD, standard deviation.

SUPPLEMENTARY METHODS

Lugogo et al

**Sample size selection**

Based on previous studies involving patients with poorly controlled asthma (Asthma Control Questionnaire 5 [ACQ-5] ≥1.5),1–3 a dropout rate of 10% was expected and it was expected that 20 to 25% of patients would experience an exacerbation. We anticipated enrolling 400 patients would give approximately 360 evaluable patients and 72–90 exacerbation events. As an exploratory aspect of the study, sample size was not considered for the predictive model and decisions on population were based on available data. Previous risk models examining the relationship between disease and possible risk factors1,3,4 have included 4–6 risk factors in the model. To avoid overfitting the data to the model, we used one predictor variable for every 10 events.5 Therefore, 360 evaluable patients would be adequate for predicting exacerbations using short-acting beta2‑agonist use and inhalation parameters as covariates.

**REFERENCES**

1. Bateman ED, Buhl R, O'Byrne PM, et al. Development and validation of a novel risk score for asthma exacerbations: the risk score for exacerbations. *J Allergy Clin Immunol.* 2015;135:1457-1464.e4.
2. Ko FW, Hui DS, Leung TF, et al. Evaluation of the asthma control test: a reliable determinant of disease stability and a predictor of future exacerbations. *Respirology.* 2012;17:370-378.
3. Quezada W, Kwak ES, Reibman J, et al. Predictors of asthma exacerbation among patients with poorly controlled asthma despite inhaled corticosteroid treatment. *Ann Allergy Asthma Immunol*. 2016;116:112-117.
4. Greenberg S, Liu N, Kaur A, et al. The asthma disease activity score: a discriminating, responsive measure predicts future asthma attacks. *J Allergy Clin Immunol*. 2012;130(5):1071-1077.e10.
5. Peduzzi P, Concato J, Kemper E, Holford TR, Feinstein AR. A simulation study of the number of events per variable in logistic regression analysis. *J Clin Epidemiol*. 1996;49:1373-1379.
